# Supplementary material for: Directionality of nose-emitted echolocation calls from bats without a nose-leaf (Plecotus auritus)
Source: Oxford University Press journal article supplement (doi:10.1242/jeb.171926), 2017-01-01
Supplement: jeb171926supp.pdf [file jeb171926supp.pdf]

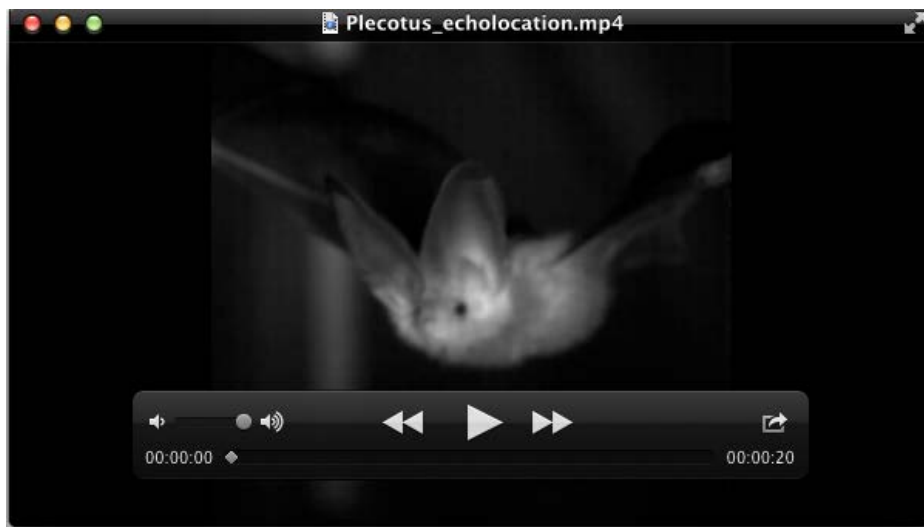

### Movie 1

Plecotus auritus flying in the windtunnel, recorded at 1000 fps and played back at 40 times reduced speed - synchronised with the audio recording.
